# Supplementary material
Source: publisher figshare collection journal article supplement (https://adisjournals.figshare.com/articles/dataset/_/13643165)
Supplement: Supplementary file 1 [file 2]

# Based on population pharmacokinetic analysis in patients with advanced malignancies, a fixed dose of cemiplimab (350 mg Q3W) was established

## Build PopPK model for dose selection\*

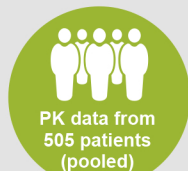

Median body weight (range):  
**76.1 (30.9–156) kg**

\*Baseline body weight significantly improved the model ( $P < 0.01$ ).

A linear two-compartment model incorporating covariates was developed to compare cemiplimab exposure at 350 mg Q3W versus 3 mg/kg Q2W

## Utilize PopPK M&S for dose selection

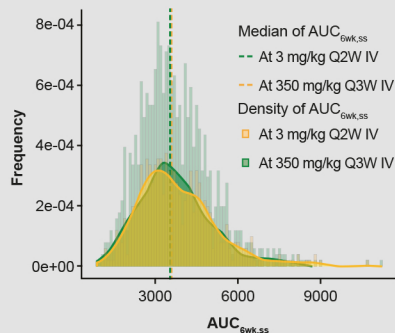

The distribution of cemiplimab  $AUC_{0-6w,ss}$  was similar at 350 mg Q3W and 3 mg/kg Q2W in advanced malignancies ( $n = 2000$ )

## Confirm dose selection using observed data

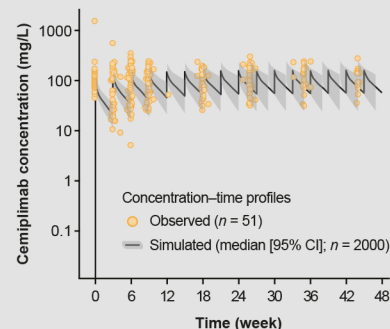

Overlay of individual observed ( $n = 51$ ) and simulated ( $n = 2000$ ) concentration-time profiles at 350 mg Q3W showed comparable cemiplimab exposure

$AUC_{0-6w,ss}$ , area under the cemiplimab concentration-time curve over 6 weeks at steady state; CI, confidence interval; IV, intravenously; M&S, modeling and simulations; PK, pharmacokinetic; PopPK, population pharmacokinetics; Q2W, every 2 weeks; Q3W, every 3 weeks.

Authors: Anne J. Paccaly, Michael R. Migden, Kyriakos P. Papadopoulos, Feng Yang, John D. Davis, Ronda K. Rippley, Israel Lowy, Matthew G. Fury, Elizabeth Stankevich, Danny Rischin.  
Correspondence: [anne.paccaly@regeneron.com](mailto:anne.paccaly@regeneron.com)
